1  
2  
3  
4  
5  
6  
7  
8  
9  
10  
11  
12  
13  
14  
15  
16  
17  
18  
19  
20  
21  
22  
23  
24  
25  
26

### Bacteriophage resistance alters antibiotic mediated intestinal expansion of enterococci

Anushila Chatterjee<sup>a,d</sup>, Cydney N. Johnson<sup>a,d</sup>, Phat Luong<sup>a</sup>, Karthik Hullahalli<sup>b</sup>, Sara W. McBride<sup>a</sup>,  
Alyxandria M. Schubert<sup>c</sup>, Kelli L. Palmer<sup>b</sup>, Paul E. Carlson Jr<sup>c</sup>, Breck A. Duerkop<sup>a,#</sup>

<sup>a</sup>Department of Immunology and Microbiology, University of Colorado School of Medicine, Aurora, CO, USA, 80045. <sup>b</sup>Department of Biological Sciences, University of Texas at Dallas, Richardson, TX, USA, 75080. <sup>c</sup>Division of Bacterial, Parasitic, and Allergenic Products, Office of Vaccines Research and Review, Center for Biologics Evaluations and Research, Food and Drug Administration, Silver Spring, MD, USA, 20993.

#Correspondence: Breck A. Duerkop [breck.duerkop@ucdenver.edu](mailto:breck.duerkop@ucdenver.edu)

<sup>d</sup>A.C. and C.N.J. contributed equally to this work

Running title: Epa promotes phage infection and colonization

Key words: bacteriophages, *Enterococcus*, antibiotic resistance, dysbiosis, intestinal colonization, exopolysaccharide

## 27 **Abstract**

28 *Enterococcus faecalis* is a human intestinal pathobiont with intrinsic and acquired resistance to  
29 many antibiotics, including vancomycin. Nature provides a diverse and virtually untapped repertoire of  
30 bacterial viruses, or bacteriophages (phages), that could be harnessed to combat multi-drug resistant  
31 enterococcal infections. Bacterial phage resistance represents a potential barrier to the implementation  
32 of phage therapy, emphasizing the importance of investigating the molecular mechanisms underlying the  
33 emergence of phage resistance. Using a cohort of 19 environmental lytic phages with tropism against *E.*  
34 *faecalis*, we found that these phages require the enterococcal polysaccharide antigen (Epa) for  
35 productive infection. Epa is a surface-exposed heteroglycan synthesized by enzymes encoded by both  
36 conserved and strain specific genes. We discovered that exposure to phage selective pressure favors  
37 mutation in non-conserved *epa* genes both in culture and in a mouse model of intestinal colonization.  
38 Despite gaining phage resistance, *epa* mutant strains exhibited a loss of resistance to the cell wall  
39 targeting antibiotics, vancomycin and daptomycin. Finally, we show that an *E. faecalis epa* mutant strain  
40 is deficient in intestinal colonization, cannot expand its population upon antibiotic-driven intestinal  
41 dysbiosis and fails to be efficiently transmitted to juvenile mice following birth. This study demonstrates  
42 that phage therapy could be used in combination with antibiotics to target enterococci within a dysbiotic  
43 microbiota. Enterococci that evade phage therapy by developing resistance may be less fit at colonizing  
44 the intestine and sensitized to vancomycin preventing their overgrowth during antibiotic treatment.

45

## 46 **Importance**

47 With the continued rise of multidrug resistant bacteria, it is imperative that new therapeutic options  
48 are explored. Bacteriophages (phages) hold promise for the amelioration of enterococcal infections,  
49 however, the mechanisms used by enterococci to subvert phage infection are understudied. Here, we  
50 demonstrate that a collection of phages require a cell surface exopolysaccharide for infection of *E.*  
51 *faecalis*. *E. faecalis* develops phage resistance by mutating polysaccharide biosynthesis genes at a cost,  
52 as this renders the bacterium more susceptible to cell wall targeting antibiotics. *E. faecalis* phage resistant

53 isolates are also less fit at colonizing the intestine and these mutations mitigate *E. faecalis* intestinal  
54 expansion upon antibiotic selection. This study suggests that the emergence of phage resistance may  
55 not always hinder the efficacy of phage therapy and that the use of phages may sensitize bacteria to  
56 antibiotics. This could serve as a promising avenue for phage-antibiotic combination therapies.

57

## 58 **Introduction**

59 Enterococci are Gram-positive commensal bacteria native to the intestinal tracts of animals,  
60 including humans (1). Under healthy conditions, enterococci exist as minority members of the microbiota  
61 in asymptomatic association with their host. However, upon antibiotic disruption of the intestinal bacterial  
62 community, enterococcal populations can flourish resulting in elevated intestinal colonization (2, 3). As  
63 dominant members of the intestinal microbiota, enterococci can breach the intestinal barrier leading to  
64 bloodstream infections (3). The pathogenic success of the enterococci is largely attributed to the  
65 development of multidrug resistance (MDR) traits, including the emergence of vancomycin resistant  
66 enterococci (VRE). *Enterococcus faecalis* and *Enterococcus faecium* represent the species most  
67 commonly associated with vancomycin resistance. In the hospital, MDR enterococcal strains can be  
68 transmitted rapidly, leading to dangerous outbreaks that put immunocompromised patients at risk (4, 5).  
69 This is especially troubling as clinical VRE isolates that are resistant to recently introduced “last-line-of-  
70 defense” antibiotics have been discovered (6-10). With limited treatment options to combat the continuing  
71 rise of MDR enterococci, it is imperative to develop alternative therapeutic approaches in addition to  
72 conventional antibiotic therapy.

73 Bacteriophages (phages), viruses that infect bacteria, could be used for the eradication of difficult  
74 to treat *E. faecalis* and *E. faecium* infections. Many of these are obligate lytic phages belonging to the  
75 *Siphoviridae* and *Myoviridae* families of tailed double stranded DNA phages (11). Current efforts in the  
76 development of phages as anti-enterococcal agents have focused on the treatment of systemic infections  
77 or surface associated biofilms (12-14), though they may also be effective in decolonizing the intestines  
78 of individuals in a hospital setting.

79 The utility of phages as effective anti-enterococcal therapeutics relies on having a detailed  
80 understanding of phage infection mechanisms and how enterococci subvert phage infection through the  
81 development of resistance. To date, only a single membrane protein, PIP<sub>EF</sub> (phage infection protein of *E.*  
82 *faecalis*), has been definitively identified as a phage receptor for *E. faecalis* (15). The enterococcal  
83 polysaccharide antigen (Epa) is involved in phage adsorption to *E. faecalis* cells and may act as a phage  
84 receptor (16-18). Considering at least a dozen well-characterized lytic enterococcal phages have the  
85 potential to be used for phage therapy (11), identifying receptors used by phages could allow for the  
86 generation of more efficient phage cocktails to be used for the treatment of enterococcal infections. This  
87 is particularly important since phage therapies can employ the use of multivalent phage cocktails to limit  
88 the emergence of bacterial resistance (19, 20) and knowledge of phage receptors can lead to rational  
89 design of such cocktails. In addition, phages often target conserved components of the bacterial cell  
90 surface, which bacteria can mutate to subvert phage infection. If a phage receptor is essential to bacterial  
91 physiology, mutation often imposes a fitness cost (21-23). Therefore, therapeutic phages could be  
92 selected that force bacterial targets to trade a fitness benefit in return for phage resistance, making them  
93 less pathogenic and possibly more susceptible to current antimicrobials (21, 24).

94 The *E. faecalis* genome contains both broadly conserved and strain variable *epa* genes (25).  
95 Using *E. faecalis* and a collection of uncharacterized virulent phages, we identify genes located in the  
96 variable region of the *epa* locus to be critical for phage infection. Epa is directly involved in phage  
97 attachment to the bacterial surface. Exposure of *E. faecalis* to certain phages, both *in vitro* and in the  
98 mouse intestine, selects for mutations in the *epa* locus, primarily in *epa* variable genes. Loss of function  
99 mutations in two *epa* variable genes, *epaS* and *epaAC*, resulted in cell surface alterations that increase  
100 the sensitivity of *E. faecalis* to cell wall targeting antibiotics. During colonization of the mouse intestine,  
101 an *E. faecalis epaS* mutant had a colonization defect in both adult mice and juvenile mice shortly following  
102 birth. The *epaS* mutant also failed to efficiently outgrow in the intestine upon antibiotic mediated  
103 perturbation of the native commensal bacteria. Together these data suggest that during enterococcal

104 intestinal dysbiosis, phages could be harnessed to selectively modify the enterococcal population in favor  
105 of *epa* mutants that could be targeted more efficiently with concurrent antibiotic therapies.

106

## 107 **Results**

### 108 ***Host range and morphology of enterococcal bacteriophages***

109 We obtained a library of 19 enterococcal specific bacteriophages through the Biological Defense  
110 Research Directorate of the Naval Medical Research Center (NMRC). These phages were isolated from  
111 environmental sources as described previously (26). Phage spot-agar assays were performed (27, 28)  
112 to assess phage infectivity against 21 *E. faecalis* strains whose susceptibility profiles for these phages  
113 were unknown. Phage lysates formed clear, opaque or no spots against specific *E. faecalis* strains,  
114 indicating strong infection, weak infection or no infection, respectively (Fig. 1A). With the exception of  
115 phi44 and phi49, each phage infected at least one *E. faecalis* strain and there was host range variability  
116 among the phages. Phages phi4, phi17, and phi19 had the broadest host range, infecting more than 75%  
117 of the *E. faecalis* strains tested. In contrast, phages phi16, phi35, phi47, phi48, and phi51 had restricted  
118 host ranges, infecting four or less *E. faecalis* strains (Fig. 1A). Hence, this phage collection includes both  
119 broad and narrow host range phages.

120 We performed transmission electron microscopy to determine the structural features of three  
121 broad host range and two narrow host range NMRC phages. Phages phi4, phi47 and phi51 belong to the  
122 *Siphoviridae* family of long non-contractile tailed phages. phi4 has a cubic icosahedral capsid symmetry  
123 (Fig. 2A), whereas phi47 and phi51 have elongated prolate capsids (Fig. 2B and 2E) (29). Phages phi17  
124 and phi19 belong to the *Myoviridae* family with icosahedral capsids and sheathed contractile tails (Fig.  
125 2C and 2D) (29).

126

### 127 ***NMRC phages infect E. faecalis independent of PIP<sub>EF</sub>***

128 To determine how NMRC phages infect *E. faecalis*, we tested their ability to infect *E. faecalis*  
129 BDU50, a *pip<sub>EF</sub>* mutant strain of *E. faecalis* V583 that is resistant to phage infection (15). Phages from

130 the NMRC collection had identical tropism for both wild type *E. faecalis* V583 and BDU50, indicating that  
131 NMRC phages infect *E. faecalis* in a PIP<sub>EF</sub>-independent manner (Fig. 3A and 3B). To determine the  
132 molecular mechanism underlying NMRC phage infection, we selected *E. faecalis* phage resistant isolates  
133 using both broad (phi4, phi17, phi19) and narrow (phi47, phi51) host range phages, using *E. faecalis*  
134 strains V583 (phi4, phi17, phi19), SF28073 (phi47) and X98 (phi51) (Table S1). Phages were mixed with  
135 *E. faecalis* in top agar, poured over the surface of an agar plate, and assayed for confluent lysis. Potential  
136 phage resistant colonies emerged within zones of lysis after overnight incubation. The spot-agar assay  
137 was used to confirm phage resistance of the isolates (Fig. 1B-D).

138 We next determined the extent of phage cross-resistance by testing the *E. faecalis* phage  
139 resistant isolates against all other phages in the NMRC collection (Fig. 1B-D). Our data show that  
140 regardless of the phage used to select for resistance, there is broad cross-resistance to other phages  
141 from the collection (Fig. 1B-D). These data suggest that even though NMRC phages have distinct host  
142 tropisms they likely infect through a related mechanism.

143

#### 144 ***Mutations in enterococcal polysaccharide antigen (epa) genes promote phage resistance***

145 To determine the genetic basis of PIP<sub>EF</sub>-independent lytic phage infection in *E. faecalis*, we  
146 performed whole genome sequencing of select spontaneous phage resistant mutants and their  
147 corresponding wild type parental strains. In all cases, no matter which phage was used to select for  
148 resistance, phage resistant isolates harbored mutations in the enterococcal polysaccharide antigen (*epa*)  
149 gene cluster (Table 1, Fig. 4A), implicating *epa* mutation as a key contributor to phage resistance.

150 The *epa* locus encodes genes involved in the biosynthesis of a rhamnose containing cell surface  
151 associated polysaccharide (30), yet the biochemical functions of most Epa proteins are uncharacterized.  
152 The *E. faecalis* *epa* gene cluster (Fig. 4A) consists of a conserved core set of 18 genes (*epaA* – *epaR*)  
153 upstream a group of variable genes beginning at *epaS* (EF2176 in V583) and ending at *epaAC* (EF2165  
154 in V583) (17, 25). *epaR*, encoding a transmembrane glycosyltransferase, was the only core gene found  
155 to be mutated (Table S1). This is consistent with a recent study demonstrating that mutation of *epaR* in

156 *E. faecalis* OG1RF results in resistance to infection by the phage NPV1 (16). The remaining mutations  
157 in the phage resistant isolates mapped to variable region *epa* genes including *epaS*, *epaW*, *epaX* and  
158 *epaAC* (Fig. 4A, 4B, and Table S1). Notably, *epaX* was recently found to aid in the adsorption of the  
159 *Podoviridae* phage Idefix (18).

160 Since *E. faecalis* is a native inhabitant of the intestine, we determined whether phage driven *epa*  
161 mutations arose in germ free C57BL6/J mice colonized with the *E. faecalis* strains V583 or SF28073.  
162 Mice were treated orally with  $10^{10}$  pfu of phi4 or phi47 for seven days, after which bacteria were isolated  
163 from the feces and screened for phage resistance by plating on agar plates containing either phi4 or  
164 phi47. We sequenced six *E. faecalis* V583 isolates resistant to phi4 and ten *E. faecalis* SF28073 isolates  
165 resistant to phi47. Similar to the phage resistant isolates acquired *in vitro*, all *in vivo* phage resistant  
166 isolates had mutations that mapped to the *epa* locus (Table S2). Mutations were restricted to *epaR* and  
167 *epaS* in the *E. faecalis* SF28073 resistant isolates. Two of the six *E. faecalis* phi4 resistant isolates in the  
168 V583 background had mutations that mapped to *epaX* and *epaAC*. The remaining four isolates had  
169 mutations that mapped to *epaY* (Table S2). Interestingly, no *epaY* mutations were found in any of 16 *in*  
170 *vitro* derived *epa* specific phage resistant isolates (Table S1), suggesting that *in vivo* phage selective  
171 pressure may be directed toward alternative *epa* variable genes.

172 Previous studies have demonstrated that core *epa* genes are important for phage infection of *E.*  
173 *faecalis* (16-18). To confirm the role of *epa* variable genes in facilitating phage infection of the NMRC  
174 phages, we generated in-frame deletion mutants of *epaS* and *epaAC* in *E. faecalis* V583 using allelic  
175 replacement. The mutants achieved a slightly lower overall culture density in the stationary phase (Fig.  
176 4D) but had a similar doubling time during logarithmic growth compared to wild type *E. faecalis* V583 (31  
177 min - wild type, 35 min -  $\Delta epaS$ , 33 min -  $\Delta epaAC$ ). We attempted to make unmarked deletions in *epaX*  
178 and *epaW*, however, we were unable to generate these mutant strains. Because *epa* mutations resulted  
179 in widespread resistance of *E. faecalis* to many of the phages in the NMRC collection (Fig. 1B), we chose  
180 to confirm these isogenic mutants using phi4. As judged by bacterial growth on agar plates containing  
181 phi4, *E. faecalis* strains BDU61 ( $\Delta epaS$ ) and BDU62 ( $\Delta epaAC$ ) were phenotypically indistinguishable



182 from the spontaneous phage resistant isolates 4RS4 and 4RS9, respectively (Fig. 4B and 4C). phi4  
183 susceptibility could be restored by complementation (Fig. 4B and 4C). Together, these data indicate that  
184 the loss-of-function of *epaS* and *epaAC* alone are sufficient to confer phage resistance.

185

### 186 ***Epa dictates phage adsorption but not phage infectivity of E. faecalis.***

187 To investigate how Epa contributes to phage infection, we tested the ability of phages to adsorb  
188 to phage resistant or wild type *E. faecalis* cells. phi4 adsorption was higher for wild type *E. faecalis* V583  
189 compared to the *epa* mutant isolates 4RS4, 4RS9, 17RS5, 19RS21 and 19RS28 (Fig. 5A). Consistent  
190 with this observation, in frame deletion of *epaS* or *epaAC* abrogated the adsorption of phi4 to *E. faecalis*  
191 (Fig. 5A). These data indicate that Epa cell wall modification is essential for phage adsorption.

192 We next assessed whether susceptibility to infection by specific phages is dictated by the ability  
193 of phages to adsorb to the surface of *E. faecalis* cells. phi4 adsorbed to both cognate (V583, X98 and  
194 SF28073) and non-cognate (CH188 and ATCC4200) *E. faecalis* cells (Fig. 5B). Similarly, phi47 adsorbed  
195 to *E. faecalis* SF28073 and adsorbed with ~60-80% efficiency to strains that it does not infect (V583,  
196 CH188 and ATCC4200) (Fig. 5C and Fig. 1A). To determine if the promiscuous adsorption observed for  
197 phi4 and phi47 was restricted to *E. faecalis*, we tested the ability of these phages to adsorb to the related  
198 enterococcal species *E. faecium*. Greater than 50% of phi4 and phi47 phage particles adsorbed to *E.*  
199 *faecium* strains Com12, Com15 and 1141733 (Fig. 5D – 5E). *E. faecium* harbors an *epa* locus which  
200 resembles the *epa* locus of *E. faecalis* (25). From these data we conclude that Epa is important for  
201 primary phage adsorption prior to infection. Considering phages phi4 and phi47 adsorb to strains that are  
202 naturally resistant to infection or killing, suggests that either abortive infection drives this resistance or an  
203 unidentified receptor required for DNA entry dictates phage infectivity.

204

205 ***epa variable gene mutations increase susceptibility to cell wall targeting antibiotics and alter cell***  
206 ***surface properties***



207 Previous work showed that mutation of the genes *epaI*, *epaR* and *epaOX* (*epaX* in strain V583),  
208 increase the susceptibility of *E. faecalis* OG1RF to the cell membrane specific antibiotic daptomycin (16,  
209 31). We sought to determine if the loss of *epa* variable genes, *epaS* and *epaAC*, conferred similar  
210 enhanced sensitivity to cell wall targeting antibiotics. To test this, we compared the sensitivity of wild type  
211 *E. faecalis* V583 and isogenic *epaS* and *epaAC* mutants to daptomycin and vancomycin. We chose to  
212 assess vancomycin sensitivity because its mechanism of action targets cell wall biosynthesis and *E.*  
213 *faecalis* V583 is vancomycin resistant (32). The *epaS* mutant showed increased susceptibility to both  
214 vancomycin and daptomycin compared to wild type *E. faecalis* V583 (Fig. 6A and 6B). To a lesser extent  
215 the *epaAC* mutant also showed increased susceptibility to both antibiotics albeit at concentrations higher  
216 than those observed for the *epaS* mutant (Fig. 6C and 6D). These data indicate that similar to other *epa*  
217 genes, *epaS* and *epaAC* play a role in the structural integrity of the *E. faecalis* cell wall during antibiotic  
218 pressure.

219 *Epa* mutations likely result in modified cell wall anchored sugar composition (16, 17). To  
220 determine if these modifications influence the overall charge of the *E. faecalis* cell wall, we performed a  
221 protein binding assay using the cationic protein cytochrome *c* (33). Cytochrome *c* bound less to the *epaS*  
222 and *epaAC* mutants compared to the wild type strain (Fig. S1). Complementation restored cytochrome *c*  
223 binding to wild type levels (Fig. S1). These data suggest that the cell wall of the *epaS* and *epaAC* mutants  
224 has a greater net positive charge compared to wild type *E. faecalis* V583, confirming that loss of function  
225 mutations in the *epa* variable genes influence cell surface charge.

226

### 227 ***EpaS* supports colonization and antibiotic mediated expansion of intestinal *E. faecalis***

228 Recently, Rigottier-Gois *et al* (34) reported that mutation of the *E. faecalis* *epa* variable gene  
229 *epaX*, encoding a group 2 glycosyltransferase domain protein, results in an intestinal colonization defect  
230 in mice. *EpaS* also contains a group 2 glycosyltransferase domain. Therefore, we tested whether an  
231 *epaS* deletion strain has an intestinal colonization defect. Groups of conventional C57BL6/J mice were  
232 colonized with either wild type *E. faecalis* V583 or an isogenic *epaS* mutant strain by oral gavage followed

233 by addition of the bacteria to the drinking water for 18 days (Fig. 7A). On day 18 the mice were given  
234 bacteria-free water and the *E. faecalis* colonization levels were monitored for 10 days. Both the wild type  
235 and *epaS* mutant established persistent colonization over the 10 day period (Fig. 7B). However,  
236 beginning three days post removal of bacteria from the drinking water (day 21), the *epaS* mutant  
237 colonized ~33-fold lower than wild type *E. faecalis* V583 (Fig. 7B). Thus, similar to *epaX*, *epaS* is a  
238 colonization factor. This also suggests that Epa glycosyltransferases are critical for intestinal colonization.

239 Enterococcal intestinal dysbiosis has been linked to antibiotic use in humans and these individuals  
240 are at increased risk of developing enterococcal blood stream infections (3, 35). Having observed that  
241 the *epaS* mutant is more susceptible to vancomycin treatment *in vitro* (Fig. 6A), we asked whether  
242 functional EpaS would be beneficial during antibiotic mediated *E. faecalis* expansion in the intestine. To  
243 test this, we performed an experiment identical to that described in Fig. 7B, except that starting on day  
244 21 the mice were gavaged with 100 µg of vancomycin daily for four days (Fig. 7C). Immediately following  
245 the first dose of vancomycin, mice colonized with wild type *E. faecalis* V583 experienced a 4-log increase  
246 in *E. faecalis* colonization compared to mice colonized with the *epaS* mutant strain (Fig. 7C). During the  
247 course of vancomycin treatment, the *epaS* mutant remained at a colonization level significantly lower  
248 level than wild type *E. faecalis* V583. Three days post vancomycin treatment we observed a slight bloom  
249 of the *epaS* mutant; however, the *epaS* mutant did not achieve a similar level of colonization compared  
250 to wild type *E. faecalis* V583. We hypothesize that this bloom may be due to vancomycin mediated killing  
251 of commensal bacteria, freeing up previously occupied niches that allow the *epaS* mutant to expand its  
252 population. Considering the *epaS* mutant strain does not rebound to the same levels as wild type *E.*  
253 *faecalis* V583 following vancomycin treatment, these data show that antibiotic induced intestinal  
254 expansion of the enterococci requires functional EpaS.

255

### 256 ***EpaS* is required for successful transmission of *E. faecalis* to newborn mice**

257 Studies suggest that offspring acquire commensal *E. faecalis* from mother's breastmilk and the  
258 vaginal tract during birth (36). However, nothing is known about the mechanisms that contribute to the

259 ability of antibiotic resistant *E. faecalis* to transmit to and colonize the intestine following birth. Therefore,  
260 we tested the ability of wild type *E. faecalis* V583 and the isogenic *epaS* mutant strain to be transmitted  
261 to naïve mouse pups born to mothers colonized with the bacteria. Female C57BL6/J mice were  
262 impregnated while continuously exposed to wild type *E. faecalis* V583 or the *epaS* mutant in their drinking  
263 water. After 21 days of bacterial exposure, the pregnant mothers were switched to clean water. The  
264 mothers littered their pups within 5-8 days after transitioning to bacteria-free drinking water. Mothers were  
265 chronically colonized for the duration of the experiment, however, the *epaS* mutant was maintained at a  
266 lower level relative to the wild type *E. faecalis* V583 (Fig. S2). After weaning (3 weeks post birth), we  
267 determined the levels of wild type *E. faecalis* V583 and the *epaS* mutant in the feces of the pups.  
268 Recovery of wild type *E. faecalis* V583 from the pups was significantly higher in comparison to the *epaS*  
269 mutant (Fig. 8). Therefore, our data suggest that EpaS is an important factor for the colonization and  
270 transmission of *E. faecalis* to newborns.

271

## 272 Discussion

273 Enterococci have developed and acquired resistance to antibiotics and continue to do so. Thus,  
274 there is renewed interest in the use of phages for the treatment of MDR infections. Understanding the  
275 molecular mechanisms underlying phage-host interactions could aid in the development of phage  
276 therapies by influencing the design of effective phage cocktails. In the current study, we assessed the  
277 infectivity of lytic phages that kill *E. faecalis* and demonstrated that genes in the variable region of the  
278 *epa* locus are involved in phage infection. Exposure to phages, both *in vitro* and *in vivo*, promoted the  
279 acquisition of phage resistance. Interestingly, phage resistant *E. faecalis* strains harboring loss-of-  
280 function mutations in the variable genes, *epaS* and *epaAC*, resulted in the sensitization of the bacteria to  
281 cell wall targeting antibiotics. Additionally, an *epaS* mutant was unable to efficiently colonize the mouse  
282 intestine of adult and juvenile mice in the presence of a conventional microbiota, and failed to overgrow  
283 during vancomycin treatment. This suggests that overgrowth of vancomycin-resistant *E. faecalis* in  
284 patients could be prevented using phage therapy. More broadly, our data suggest that phages could be

285 used to exploit the evolution of bacterial phage resistance as an adjuvant to antibiotic therapy, in cases  
286 where acquisition of phage resistance leads to new antibiotic sensitivities.

287 Bacterial surface polysaccharides directly interact with mammalian host surfaces and are key  
288 virulence factors (17, 34, 37-41). Previous studies identified glucose, rhamnose, *N*-acetylglucosamine,  
289 *N*-acetyl galactosamine, and galactose as major components of Epa (17, 34); however, there are gaps  
290 in our understanding of the Epa cell surface architecture. Epa is produced through the action of  
291 biosynthetic enzymes encoded by select core genes residing in *epaA–epaR* (17, 34, 42). It is less clear  
292 how the genes in the variable region contribute to overall Epa composition. We discovered that the ability  
293 of phages to infect *E. faecalis* is mediated through Epa. Specifically, mutations in the core gene *epaR*  
294 and/or variable region genes including *epaS*, *epaW*, *epaX*, *epaY* and *epaAC* were sufficient to abrogate  
295 phage infection. Recently, it was discovered that mutation of *epaR* and *epaX* in *E. faecalis* prevented  
296 phage infection by excluding phage adsorption (16, 18). Here, we found that modifications made by *epa*  
297 variable genes are important for initial phage adsorption, although adsorption does not always lead to  
298 successful phage infection.

299 Phage infection occurs in three distinct stages: phage adsorption, host receptor engagement and  
300 phage DNA replication. Considering the phages from our study adsorb to non-susceptible bacterial  
301 strains, it is likely that non-cognate hosts either have an incompatible cognate receptor, lack the required  
302 phage receptor, or abort phage DNA replication. It is curious that all 32 phage resistant isolates reported  
303 in this study harbored mutations only in *epa* genes. This observation, combined with the knowledge that  
304 the phages adsorb to non-cognate host strains, indicates that *E. faecalis* preferentially subverts phage  
305 infection by mutating *epa*. We hypothesize that another factor is required for productive phage infection.  
306 This second factor is likely a bonafide phage receptor that facilitates DNA entry and may be an essential  
307 protein, as only *epa* mutations arose in phage resistant *E. faecalis* isolates. We propose that Epa is the  
308 attachment factor that positions phages in proximity of an unidentified receptor required for DNA ejection.

309 Previous studies have demonstrated that inactivation of core *epa* genes in *E. faecalis* affect  
310 bacterial fitness (16, 17). However, we have a limited understanding of the contribution of *epa* variable

311 genes in this context. Similar to a recent report that an *epaX* mutant strain of *E. faecalis* has an intestinal  
312 colonization defect (34), we demonstrated that an *epaS* mutant strain is also impaired in intestinal  
313 colonization. Importantly, we show that *epaS* is a colonization determinant within the context of an  
314 unperturbed microbiota. This shows that Epa cell surface decorations help *E. faecalis* compete in a  
315 complex microbial community. In addition, an *epaS* mutant was impaired in its ability to transfer from  
316 mother to infant and establish productive colonization. Considering enterococci are life-long colonizers  
317 of humans and animals, this observation raises interesting questions about whether enterococci are  
318 transferred directly from mother to infant or if they are acquired from the environment following birth.

319 *E. faecalis* intestinal adaptation is facilitated by its inherent resistance to environmental stressors  
320 encountered in the mammalian gut such as low pH, high osmolarity and bile salts (16, 31, 43-45).  
321 Therefore, Epa likely plays a critical role in the survival of *E. faecalis* when encountering intestinal  
322 environmental stresses. *epa* genes aid in the ability of *E. faecalis* to tolerate environmental stress which  
323 is demonstrated by phage resistance and susceptibility to cell wall targeting antibiotics upon loss of  
324 functional *epa* genes. When challenged with vancomycin, an *epaS* mutant of *E. faecalis* in the mouse  
325 intestine lacks the ability to efficiently expand its population when bacterial diversity is diminished. These  
326 data suggest that the *epaS* mutant cannot tolerate vancomycin selection and remains a minority member  
327 of the microbiota.

328 In conclusion, we believe that phages like those described in this study are candidates for the  
329 development of straightforward therapeutics that could be used in conjunction with current antibiotic  
330 therapies to curtail the overgrowth of multidrug-resistant enterococci in vulnerable patients. We also  
331 believe that these data emphasize the importance of understanding phage infection mechanisms for the  
332 future development of phage cocktails. This information could help reduce the risk of developing phage  
333 resistance during therapy.

334

335 **Materials and Methods**

336 **Bacteria and bacteriophages.** A list of the bacterial and bacteriophage strains used in this study can be  
337 found in Table S3. *E. faecalis* and *E. faecium* were grown with aeration on brain heart infusion (BHI) broth  
338 or on BHI agar at 37°C. *Escherichia coli* was grown on Lennox L broth (LB) with aeration or on LB agar  
339 at 37°C. When necessary, for the selection of *E. coli* or *E. faecalis*, 15 µg/ml chloramphenicol (Research  
340 Products International) was added to the media. Growth conditions for the generation of mutant strains  
341 of *E. faecalis* by allelic exchange were as described by Thurlow et al. (46). Phage sensitivity assays were  
342 performed on Todd-Hewitt broth (THB) agar. The library of 19 enterococcal specific bacteriophages were  
343 obtained through the Biological Defense Research Directorate of the Naval Medical Research Center  
344 (NMRC).

345

346 **Determination of phage host range.** The lytic activities of the 19 phages from the NMRC collection  
347 were screened against 21 different *E. faecalis* strains using a standard spot assay (27, 28). 250 µl of a  
348 1:5 dilution of an overnight (O/N) culture of *E. faecalis* was mixed with 5 ml of THB top agar (0.35% agar)  
349 and poured onto the surface of a THB agar plate (1.5% agar). Both top agar and base agar were  
350 supplemented with 10 mM MgSO<sub>4</sub>. 5 µl of each phage lysate was spotted on the bacterial overlay plate.  
351 The plates were incubated at 37°C O/N, and *E. faecalis* sensitivity to individual phages was indicated by  
352 either clear, opaque or no clearing spots which indicated infection, weak infection and no infection,  
353 respectively.

354

355 **Isolation of phage resistant *E. faecalis* strains.** 250 µl of a 1:5 dilution of an O/N culture of host bacteria  
356 was mixed with 10 µl of serially diluted phage and 5 ml of pre-warmed THB top agar. Phage-bacterial  
357 mixtures were poured onto the surface of THB agar plates. The plates were incubated at 37°C until  
358 phage-resistant colonies appeared in the zones of clearing. The presumptive resistant colonies were  
359 passaged four times by streaking single colonies onto BHI agar. The phage-resistant phenotypes were  
360 confirmed by spot assays (27, 28).

361

362 **Phage adsorption assay.** An O/N bacterial culture was pelleted at 3220 x g for 10 minutes and  
363 resuspended to 10<sup>8</sup> cfu/ml in SM-plus buffer (100 mM NaCl, 50 mM Tris-HCl, 8 mM MgSO<sub>4</sub>, 5 mM CaCl<sub>2</sub>  
364 [pH 7.4]). The cell suspensions were mixed with phages at a multiplicity of infection of 0.1 and incubated  
365 at room-temperature without agitation for 10 minutes. The bacteria-phage suspensions were centrifuged  
366 at 24,000 x g for 1 minute and the supernatant was collected to determine the phage concentration by  
367 plaque assay. SM-plus buffer with phage only (no bacteria) served as a control. Percent adsorption was  
368 determined as follows:

$$\frac{\text{pfu}_{\text{control}} - \text{pfu}_{\text{test supernatant}}}{\text{pfu}_{\text{control}}} \times 100$$

371  
372 **Antibiotic susceptibility assay.** *E. faecalis* was added to 7 ml of BHI broth (5x10<sup>5</sup> cfu/ml final density).  
373 Daptomycin (Tokyo Chemical Industry) or vancomycin (Alvogen) were added to obtain the desired  
374 concentrations indicated in Figure 6. Cultures containing daptomycin were supplemented with 50 mg/ml  
375 CaCl<sub>2</sub>. Cultures were incubated at 37°C with aeration O/N. To determine viable cfu after O/N growth,  
376 cultures were serially diluted in phosphate buffered saline (PBS) and 10 µl were spotted onto BHI agar  
377 and incubated at 37°C O/N. Viable cfu/ml were determined by colony counting.

378  
379 **Animals.** C57BL6/J (conventional and germ free) male and female mice were used for these studies.  
380 For detailed information on specific animal experiments see the Supplementary Materials and Methods.  
381 All animal protocols were approved by the Institutional Animal Care and Use Committee of the University  
382 of Colorado School of Medicine (protocol number 00253).

### 383 384 **Data Availability**

385 The DNA sequencing reads associated with this study are deposited at the European Nucleotide  
386 Archive (<http://www.ebi.ac.uk/ena>) under accession number PRJEB30526.

387



## 388 Acknowledgements

389 We thank Biswajit Biswas for providing the NMRC phage collection. We thank Michael Gilmore  
390 for providing *E. faecalis* strain SF28073. This work was supported by National Institutes of Health R01  
391 AI141479 (B.A.D.), K01 DK102436 (B.A.D.), R01 AI116610 (K.L.P.) and a National Institutes of Health  
392 and Food and Drug administration Inter-Agency Agreement AAI15010-001 (P.E.C.Jr.).

393

## 394 References

- 395 1. Lebreton F, Willems RJL, Gilmore MS. 2014. *Enterococcus* diversity, origins in nature, and gut  
396 colonization. In Gilmore MS, Clewell DB, Ike Y, Shankar N (ed), Enterococci: From Commensals  
397 to Leading Causes of Drug Resistant Infection, Boston.
- 398 2. Al-Nassir WN, Sethi AK, Li Y, Pultz MJ, Riggs MM, Donskey CJ. 2008. Both oral metronidazole  
399 and oral vancomycin promote persistent overgrowth of vancomycin-resistant enterococci during  
400 treatment of *Clostridium difficile*-associated disease. Antimicrob Agents Chemother 52:2403-6.
- 401 3. Ubeda C, Taur Y, Jenq RR, Equinda MJ, Son T, Samstein M, Viale A, Socci ND, van den Brink  
402 MR, Kamboj M, Pamer EG. 2010. Vancomycin-resistant *Enterococcus* domination of intestinal  
403 microbiota is enabled by antibiotic treatment in mice and precedes bloodstream invasion in  
404 humans. J Clin Invest 120:4332-41.
- 405 4. Pan SC, Wang JT, Chen YC, Chang YY, Chen ML, Chang SC. 2012. Incidence of and risk factors  
406 for infection or colonization of vancomycin-resistant enterococci in patients in the intensive care  
407 unit. PLoS One 7:e47297.
- 408 5. Zirakzadeh A, Patel R. 2006. Vancomycin-resistant enterococci: colonization, infection, detection,  
409 and treatment. Mayo Clin Proc 81:529-36.
- 410 6. Arias CA, Panesso D, McGrath DM, Qin X, Mojica MF, Miller C, Diaz L, Tran TT, Rincon S, Barbu  
411 EM, Reyes J, Roh JH, Lobos E, Sodergren E, Pasqualini R, Arap W, Quinn JP, Shamoo Y, Murray

- 412 BE, Weinstock GM. 2011. Genetic basis for in vivo daptomycin resistance in enterococci. N Engl  
413 J Med 365:892-900.
- 414 7. Liu Y, Wang Y, Wu C, Shen Z, Schwarz S, Du XD, Dai L, Zhang W, Zhang Q, Shen J. 2012. First  
415 report of the multidrug resistance gene *cfr* in *Enterococcus faecalis* of animal origin. Antimicrob  
416 Agents Chemother 56:1650-4.
- 417 8. Munoz-Price LS, Lolans K, Quinn JP. 2005. Emergence of resistance to daptomycin during  
418 treatment of vancomycin-resistant *Enterococcus faecalis* infection. Clin Infect Dis 41:565-6.
- 419 9. Palmer KL, Daniel A, Hardy C, Silverman J, Gilmore MS. 2011. Genetic basis for daptomycin  
420 resistance in enterococci. Antimicrob Agents Chemother 55:3345-56.
- 421 10. Patel SN, Memari N, Shahinas D, Toye B, Jamieson FB, Farrell DJ. 2013. Linezolid resistance in  
422 *Enterococcus faecium* isolated in Ontario, Canada. Diagn Microbiol Infect Dis 77:350-3.
- 423 11. Duerkop BA, Palmer KL, Horsburgh MJ. 2014. Enterococcal bacteriophages and genome  
424 defense. In Gilmore MS, Clewell DB, Ike Y, Shankar N (ed), Enterococci: From Commensals to  
425 Leading Causes of Drug Resistant Infection, Boston.
- 426 12. Biswas B, Adhya S, Washart P, Paul B, Trostel AN, Powell B, Carlton R, Merril CR. 2002.  
427 Bacteriophage therapy rescues mice bacteremic from a clinical isolate of vancomycin-resistant  
428 *Enterococcus faecium*. Infect Immun 70:204-10.
- 429 13. Khalifa L, Brosh Y, Gelman D, Copenhagen-Glazer S, Beyth S, Poradosu-Cohen R, Que YA,  
430 Beyth N, Hazan R. 2015. Targeting *Enterococcus faecalis* biofilms with phage therapy. Appl  
431 Environ Microbiol 81:2696-705.
- 432 14. Zhang W, Mi Z, Yin X, Fan H, An X, Zhang Z, Chen J, Tong Y. 2013. Characterization of  
433 *Enterococcus faecalis* phage IME-EF1 and its endolysin. PLoS One 8:e80435.

- 434 15. Duerkop BA, Huo W, Bhardwaj P, Palmer KL, Hooper LV. 2016. Molecular basis for lytic  
435 bacteriophage resistance in enterococci. *MBio* 7.
- 436 16. Ho K, Huo W, Pas S, Dao R, Palmer KL. 2018. Loss-of-function mutations in *epaR* confer  
437 resistance to  $\phi$ NPV1 infection in *Enterococcus faecalis* OG1RF. *Antimicrob Agents Chemother*  
438 62.
- 439 17. Teng F, Singh KV, Bourgogne A, Zeng J, Murray BE. 2009. Further characterization of the *epa*  
440 gene cluster and *Epa* polysaccharides of *Enterococcus faecalis*. *Infect Immun* 77:3759-67.
- 441 18. Lossouarn J, Briet A, Moncaut E, Furlan S, Bouteau A, Son O, Leroy M, DuBow MS, Lecointe F,  
442 Serror P, Petit MA. 2019. *Enterococcus faecalis* countermeasures defeat a virulent *Picovirinae*  
443 bacteriophage. *Viruses* 11.
- 444 19. Cairns BJ, Payne RJ. 2008. Bacteriophage therapy and the mutant selection window. *Antimicrob*  
445 *Agents Chemother* 52:4344-50.
- 446 20. Chan BK, Abedon ST, Loc-Carrillo C. 2013. Phage cocktails and the future of phage therapy.  
447 *Future Microbiol* 8:769-83.
- 448 21. Chan BK, Siström M, Wertz JE, Kortright KE, Narayan D, Turner PE. 2016. Phage selection  
449 restores antibiotic sensitivity in MDR *Pseudomonas aeruginosa*. *Sci Rep* 6:26717.
- 450 22. Filippov AA, Sergueev KV, He Y, Huang XZ, Gnade BT, Mueller AJ, Fernandez-Prada CM,  
451 Nikolich MP. 2011. Bacteriophage-resistant mutants in *Yersinia pestis*: identification of phage  
452 receptors and attenuation for mice. *PLoS One* 6:e25486.
- 453 23. Meaden S, Paszkiewicz K, Koskella B. 2015. The cost of phage resistance in a plant pathogenic  
454 bacterium is context-dependent. *Evolution* 69:1321-8.

- 455 24. Schooley RT, Biswas B, Gill JJ, Hernandez-Morales A, Lancaster J, Lessor L, Barr JJ, Reed SL,  
456 Rohwer F, Benler S, Segall AM, Taplitz R, Smith DM, Kerr K, Kumaraswamy M, Nizet V, Lin L,  
457 McCauley MD, Strathdee SA, Benson CA, Pope RK, Leroux BM, Picel AC, Mateczun AJ, Cilwa  
458 KE, Regeimbal JM, Estrella LA, Wolfe DM, Henry MS, Quinones J, Salka S, Bishop-Lilly KA,  
459 Young R, Hamilton T. 2017. Development and use of personalized bacteriophage-based  
460 therapeutic cocktails to treat a patient with a disseminated resistant *Acinetobacter baumannii*  
461 infection. *Antimicrob Agents Chemother* 61.
- 462 25. Palmer KL, Godfrey P, Griggs A, Kos VN, Zucker J, Desjardins C, Cerqueira G, Gevers D, Walker  
463 S, Wortman J, Feldgarden M, Haas B, Birren B, Gilmore MS. 2012. Comparative genomics of  
464 enterococci: variation in *Enterococcus faecalis*, clade structure in *E. faecium*, and defining  
465 characteristics of *E. gallinarum* and *E. casseliflavus*. *MBio* 3:e00318-11.
- 466 26. Regeimbal JM, Jacobs AC, Corey BW, Henry MS, Thompson MG, Pavlicek RL, Quinones J,  
467 Hannah RM, Ghebremedhin M, Crane NJ, Zurawski DV, Teneza-Mora NC, Biswas B, Hall ER.  
468 2016. Personalized therapeutic cocktail of wild environmental phages rescues mice from  
469 *Acinetobacter baumannii* wound infections. *Antimicrob Agents Chemother* 60:5806-16.
- 470 27. Carlson K. 2005. Working with bacteriophages: common techniques and methodological  
471 approaches, vol 1. CRC Press Boca Raton, FL.
- 472 28. Kutter E. 2009. Phage host range and efficiency of plating. *Methods Mol Biol* 501:141-9.
- 473 29. Ackermann HW. 2007. 5500 Phages examined in the electron microscope. *Arch Virol* 152:227-  
474 43.
- 475 30. Xu Y, Murray BE, Weinstock GM. 1998. A cluster of genes involved in polysaccharide  
476 biosynthesis from *Enterococcus faecalis* OG1RF. *Infect Immun* 66:4313-23.

- 477 31. Dale JL, Cagnazzo J, Phan CQ, Barnes AM, Dunny GM. 2015. Multiple roles for *Enterococcus*  
478 *faecalis* glycosyltransferases in biofilm-associated antibiotic resistance, cell envelope integrity,  
479 and conjugative transfer. *Antimicrob Agents Chemother* 59:4094-105.
- 480 32. Sahm DF, Kissinger J, Gilmore MS, Murray PR, Mulder R, Solliday J, Clarke B. 1989. In vitro  
481 susceptibility studies of vancomycin-resistant *Enterococcus faecalis*. *Antimicrob Agents*  
482 *Chemother* 33:1588-91.
- 483 33. Kristian SA, Datta V, Weidenmaier C, Kansal R, Fedtke I, Peschel A, Gallo RL, Nizet V. 2005. D-  
484 alanylation of teichoic acids promotes group A *Streptococcus* antimicrobial peptide resistance,  
485 neutrophil survival, and epithelial cell invasion. *J Bacteriol* 187:6719-25.
- 486 34. Rigottier-Gois L, Madec C, Navickas A, Matos RC, Akary-Lepage E, Mistou MY, Serror P. 2015.  
487 The surface rhamnopolysaccharide epa of *Enterococcus faecalis* is a key determinant of intestinal  
488 colonization. *J Infect Dis* 211:62-71.
- 489 35. Donskey CJ, Chowdhry TK, Hecker MT, Hoyen CK, Hanrahan JA, Hujer AM, Hutton-Thomas RA,  
490 Whalen CC, Bonomo RA, Rice LB. 2000. Effect of antibiotic therapy on the density of vancomycin-  
491 resistant enterococci in the stool of colonized patients. *N Engl J Med* 343:1925-32.
- 492 36. Avershina E, Angell IL, Simpson M, Storro O, Oien T, Johnsen R, Rudi K. 2018. Low maternal  
493 microbiota sharing across gut, breast milk and vagina, as revealed by 16S rRNA gene and  
494 reduced metagenomic sequencing. *Genes* 9.
- 495 37. Xu S, Arbeit RD, Lee JC. 1992. Phagocytic killing of encapsulated and microencapsulated  
496 *Staphylococcus aureus* by human polymorphonuclear leukocytes. *Infect Immun* 60:1358-62.
- 497 38. Gibson RL, Lee MK, Soderland C, Chi EY, Rubens CE. 1993. Group B streptococci invade  
498 endothelial cells: type III capsular polysaccharide attenuates invasion. *Infect Immun* 61:478-85.

- 499 39. Hulse ML, Smith S, Chi EY, Pham A, Rubens CE. 1993. Effect of type III group B streptococcal  
500 capsular polysaccharide on invasion of respiratory epithelial cells. *Infect Immun* 61:4835-41.
- 501 40. Arduino RC, Jacques-Palaz K, Murray BE, Rakita RM. 1994. Resistance of *Enterococcus faecium*  
502 to neutrophil-mediated phagocytosis. *Infect Immun* 62:5587-94.
- 503 41. Geiss-Liebisch S, Rooijackers SH, Beczala A, Sanchez-Carballo P, Kruszynska K, Repp C,  
504 Sakinc T, Vinogradov E, Holst O, Huebner J, Theilacker C. 2012. Secondary cell wall polymers  
505 of *Enterococcus faecalis* are critical for resistance to complement activation via mannose-binding  
506 lectin. *J Biol Chem* 287:37769-77.
- 507 42. Hancock LE, Gilmore MS. 2002. The capsular polysaccharide of *Enterococcus faecalis* and its  
508 relationship to other polysaccharides in the cell wall. *Proc Natl Acad Sci U S A* 99:1574-9.
- 509 43. Giard JC, Laplace JM, Rince A, Pichereau V, Benachour A, Leboeuf C, Flahaut S, Auffray Y,  
510 Hartke A. 2001. The stress proteome of *Enterococcus faecalis*. *Electrophoresis* 22:2947-54.
- 511 44. Solheim M, Aakra A, Vebo H, Snipen L, Nes IF. 2007. Transcriptional responses of *Enterococcus*  
512 *faecalis* V583 to bovine bile and sodium dodecyl sulfate. *Appl Environ Microbiol* 73:5767-74.
- 513 45. Bohle LA, Faergestad EM, Veiseth-Kent E, Steinmoen H, Nes IF, Eijsink VG, Mathiesen G. 2010.  
514 Identification of proteins related to the stress response in *Enterococcus faecalis* V583 caused by  
515 bovine bile. *Proteome Sci* 8:37.
- 516 46. Thurlow LR, Thomas VC, Hancock LE. 2009. Capsular polysaccharide production in  
517 *Enterococcus faecalis* and contribution of CpsF to capsule serospecificity. *J Bacteriol* 191:6203-  
518 10.

519

## 520 **Figure Legends**

521

522 **Figure 1. NMRC phages have broad and narrow *E. faecalis* host ranges.** Red, pink and blue boxes  
523 represent the results of phage infection spot assays indicating infection, weak infection and no infection,  
524 respectively. **(A)** The host range of 19 NMRC phages against 21 different *E. faecalis* strains. **(B – D)**  
525 Phage sensitivity profiles of *E. faecalis* phage resistant isolates indicates a high degree of cross infectivity  
526 among NMRC phages. **(B)** phi4, phi17 and phi19 resistant strains have lost susceptibility to the majority  
527 of phages that can infect the V583 parental strain. **(C)** Compared to the wild type X98, phi51 resistant  
528 mutants gained immunity against all phages capable of infecting X98. **(D)** Spot assays demonstrate that  
529 phi47 resistant *E. faecalis* are now resistant to phages phi4, phi17 and phi19.

530

531 **Figure 2. Transmission electron microscopy of NMRC phages reveals diverse morphologies.** All  
532 phages imaged are double stranded DNA phages of the order Caudovirales. Phages phi4 **(A)**, phi47 **(B)**  
533 and phi51 **(E)** are *Siphoviridae*. Phage phi17 **(C)** and phi19 **(D)** are *Myoviridae*.

534

535 **Figure 3. NMRC phages infect *E. faecalis* independent of PIP<sub>EF</sub>.** NMRC phages were spotted onto  
536 **(A)** wild type *E. faecalis* V583 or **(B)** *E. faecalis* BDU50 a  $\Delta pip_{EF}$  isogenic mutant of strain V583.

537

538 **Figure 4. Mutations in the *epa* locus confer phage resistance.** **(A)** Schematic depicting the *epa* locus  
539 of *E. faecalis* V583. The core *epa* genes (*epaA* – *epaR*) found in all *E. faecalis* strains are shown in grey.  
540 *epa* variable genes (*epaS* – *epaAC*) downstream of the conserved core genes are shown in black. Genes  
541 with vertical black lines indicate insertion sequence elements IS256 or ISEf1. White genes indicate a  
542 putative racemase gene that has been disrupted by an IS256 element. Stars designate genes where  
543 mutations were found in sequenced phage resistant isolates. All the genes are drawn to scale. **(B – C)**  
544 phi4 susceptibility assays were performed on serially diluted overnight cultures of specific bacterial  
545 strains. Dilutions were spotted onto THB agar plates with or without  $5 \times 10^8$  pfu/ml of phi4. Representative  
546 spot plates **(B)** and the corresponding quantitative viable colony counts **(C)** are shown. **(D)** Growth curves  
547 comparing wild type *E. faecalis* V583 and isogenic *epa* mutant strains in BHI broth. The dashed horizontal



548 line in C indicates the limit of detection based on the bacterial plating procedure. -E (empty vector) and -  
549 C (complemented). Open bars below the limit of detection in **(C)** occur when one or more colonies arise  
550 for a single experimental replicate at the  $10^{-3}$  dilution. ND – none detected.

551

552 **Figure 5. NMRC phages adsorb to a broad array of enterococci through Epa. (A)** Wild type *E.*  
553 *faecalis* V583 but not spontaneous *epa* mutants or isogenic *epa* deletion strains of *E. faecalis* efficiently  
554 adsorb phi4. **(B)** phi4 adsorption profile of cognate (V583, X98 and SF28073) and non-cognate (CH188  
555 and ATCC4200) *E. faecalis* strains. **(C)** phi47 adsorption profile of cognate (SF28073) and non-cognate  
556 (V583, X98, CH188 and ATCC4200) *E. faecalis* strains. **(D – E)** phi4 and phi47 adsorption to various  
557 strains of the related bacterium *E. faecium*.

558

559 **Figure 6. *E. faecalis epa* mutant strains are more susceptible to cell wall targeting antibiotics.**  
560 Antibiotic susceptibility profiles of wild type *E. faecalis* V583 and the *epa* mutant strains BDU61 ( $\Delta epaS$ )  
561 and BDU62 ( $\Delta epaAC$ ). Vancomycin susceptibility **(A and C)** and daptomycin susceptibility **(B and D)** of  
562 the mutants was compared to wild type *E. faecalis* V583 and complementation strains, -E (empty vector)  
563 and -C (complemented). \* $p < 0.01$ , \*\*  $p < 0.001$ , \*\*\* $p < 0.0008$ , \*\*\*\* $p < 0.0001$  by Student's t-test.

564

565 **Figure 7. Mutation of *epaS* ameliorates antibiotic mediated expansion of intestinal *E. faecalis*. (A)**  
566 Cartoon depicting the regiment of bacterial and antibiotic exposure to mice. **(B)** Colonization of  
567 conventional mice with either wild type *E. faecalis* V583 or the isogenic *epaS* mutant strain. **(C)**  
568 Colonization of conventional mice with either wild type *E. faecalis* V583 or the isogenic *epaS* mutant  
569 strain. At day 21 (indicated with an arrowhead), following the introduction of bacteria-free water, the mice  
570 were orally treated with 100  $\mu$ g of vancomycin daily for four days. The dashed horizontal lines in **(B)** and  
571 **(C)** indicates the limit of detection based on the bacterial plating procedure. \* $p < 0.04$ , \*\* $p < 0.008$  by  
572 Student's t-test with Mann-Whitney U correction.

573

574 **Figure 8. Mutation of *epaS* prevents transmission to and colonization of offspring born to**  
575 **chronically colonized mothers.** Fecal abundance of wild type *E. faecalis* V583 and the *epaS* mutant  
576 strain BDU61 from juvenile mice born to chronically colonized mothers. Data show the cfu/gram of feces  
577 on day 1 (3 weeks after birth), day 4 and day 7 post weaning. The dashed horizontal line indicates the  
578 limit of detection based on the bacterial plating procedure. \* $p=0.001$ , \*\* $p<0.0001$  by Student's t-test with  
579 Mann-Whitney U correction.

580

581 **Figure S1. The cell surface of *E. faecalis epa* mutant strains is more positively charged.**  
582 Cytochrome *c* binding to the surface of various *E. faecalis* strains indicates that mutations in the *epa*  
583 variable genes *epaS* and *epaAC* alter the net charge of the cell wall. -E (empty vector) and -C  
584 (complemented). \* $p<0.02$ , \*\* $p<0.008$ , \*\*\* $p<0.001$  by multiple comparisons one-way ANOVA and Tukey's  
585 multiple comparison post-hoc test.

586

587 **Figure S2. Mothers are colonized long-term by wild type and the *epaS* mutant strains of *E. faecalis*.**  
588 Intestinal colonization levels of wild type *E. faecalis* V583 and the *epaS* mutant strain BDU61 from the  
589 mothers bearing pups used in the transmission experiments shown in Figure 8. Arrowheads indicate the  
590 day that the mothers gave birth to the pups.

591

592 **Table S1. Spontaneous mutations in the *epa* cluster result in phage resistance in vitro.**

593

594 **Table S2. Spontaneous mutations in the *epa* cluster result in phage resistance in vivo.**

595

596 **Table S3. Bacterial strains, phages, plasmids and primers.**

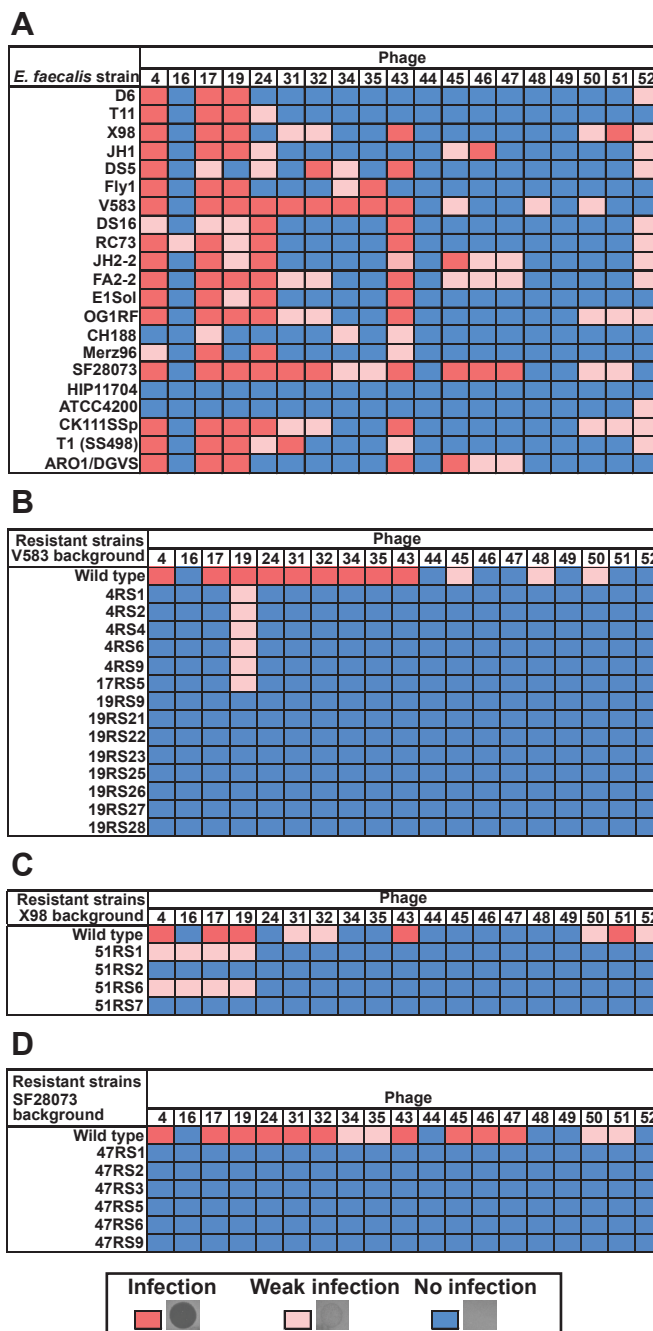

Figure 1

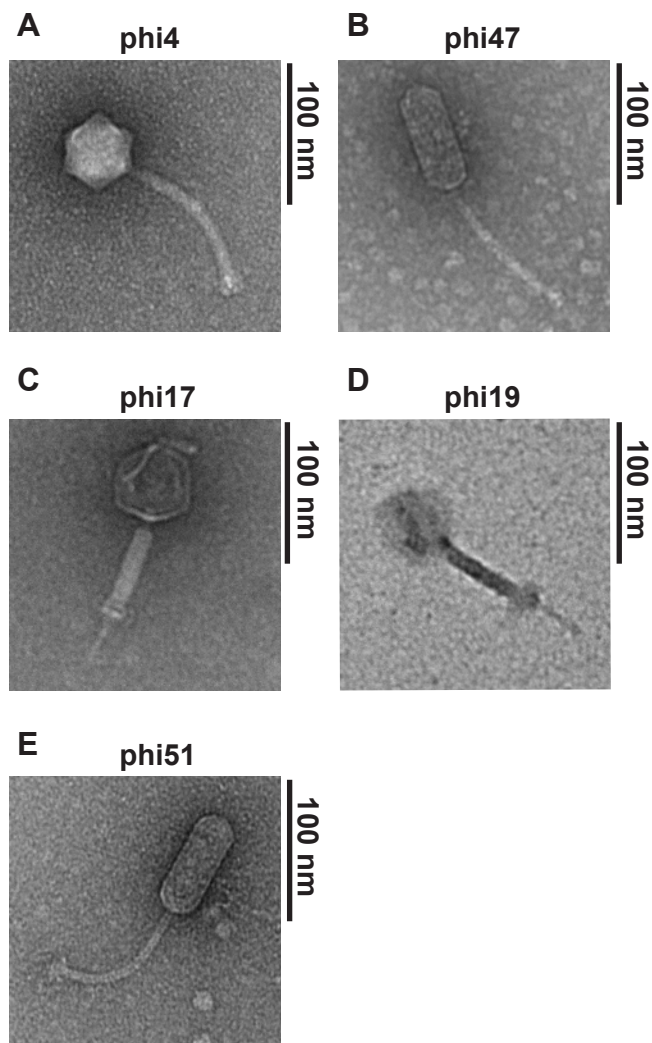

**Figure 2**

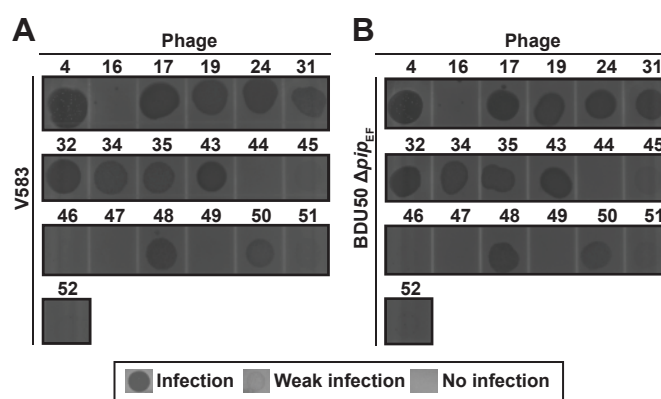

Figure 3

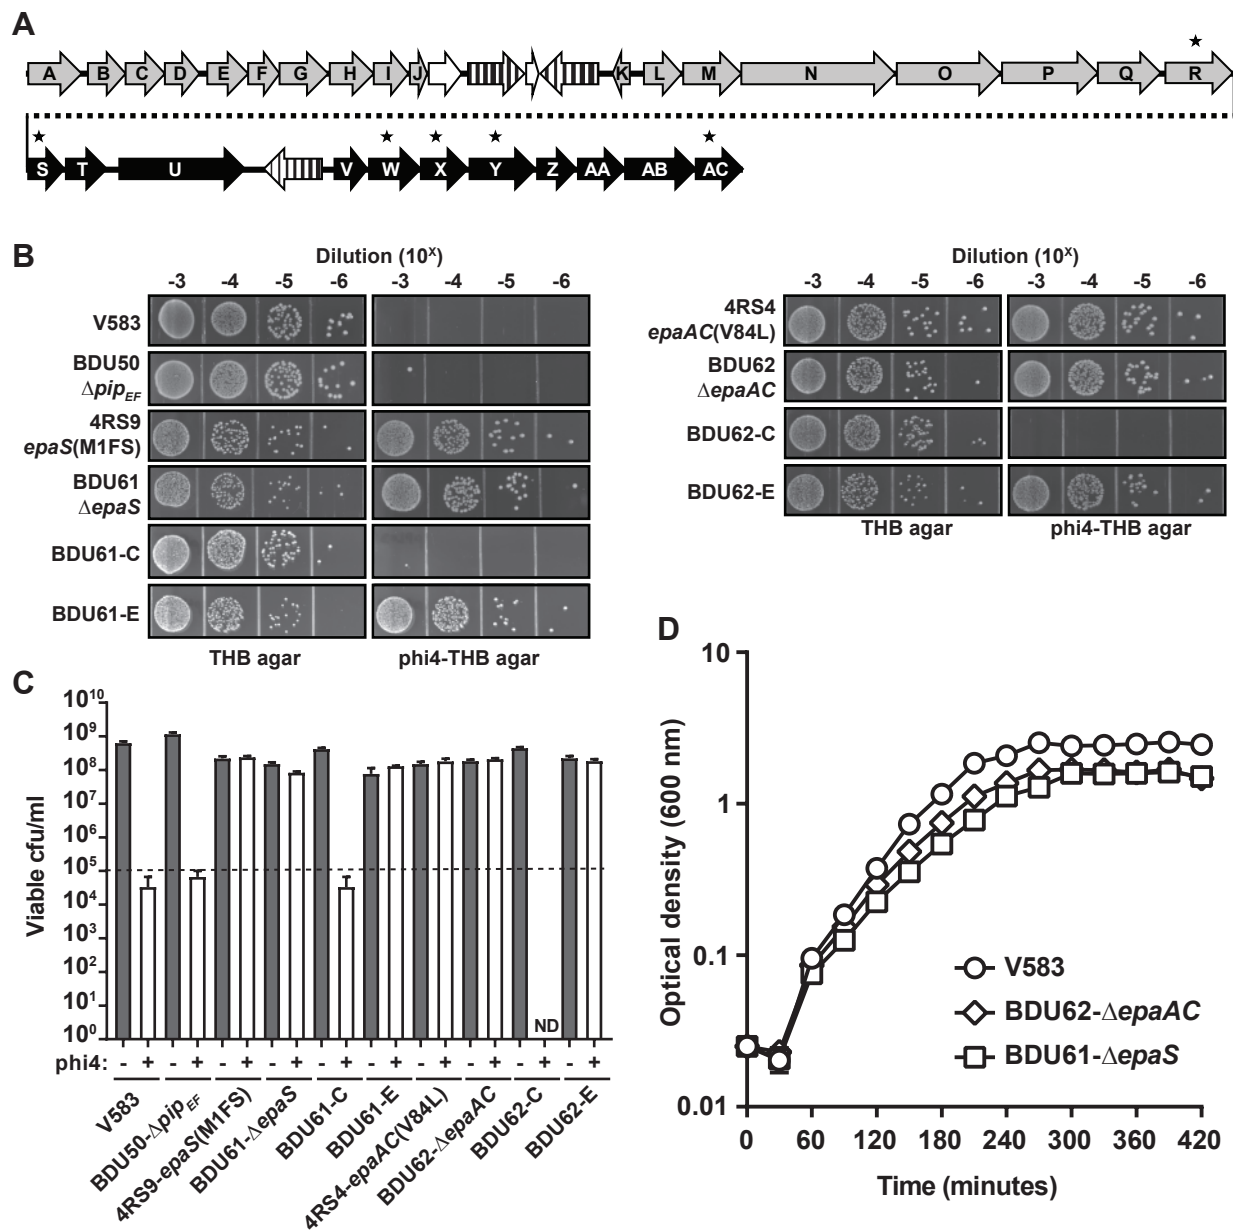

Figure 4

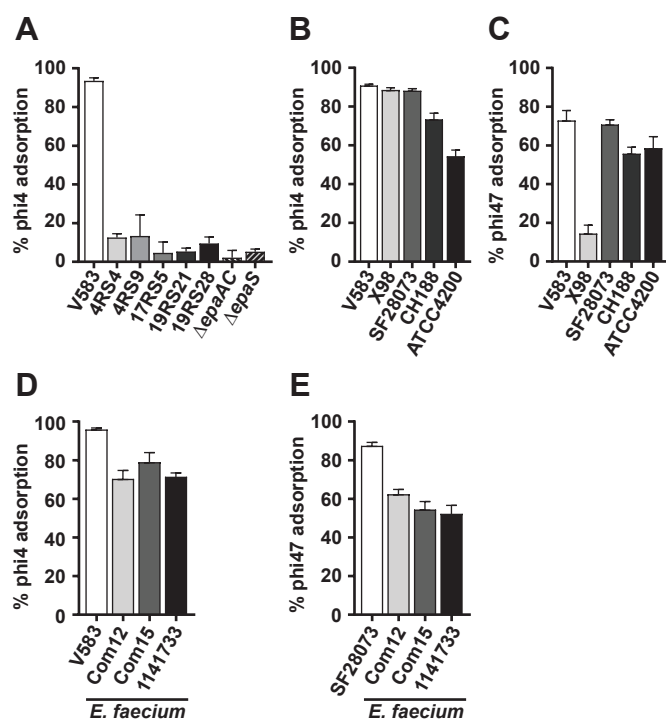

Figure 5



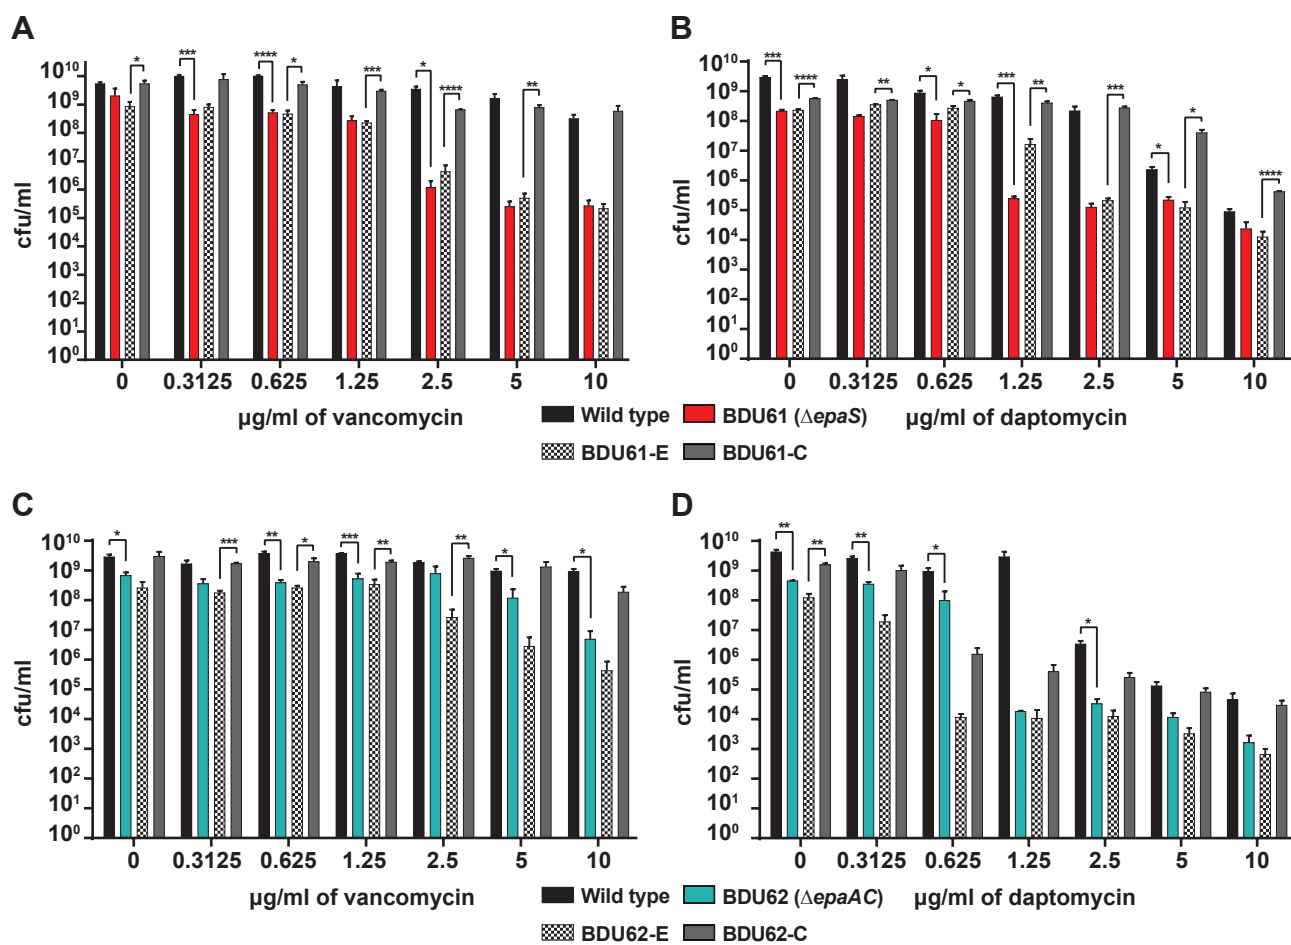

Figure 6

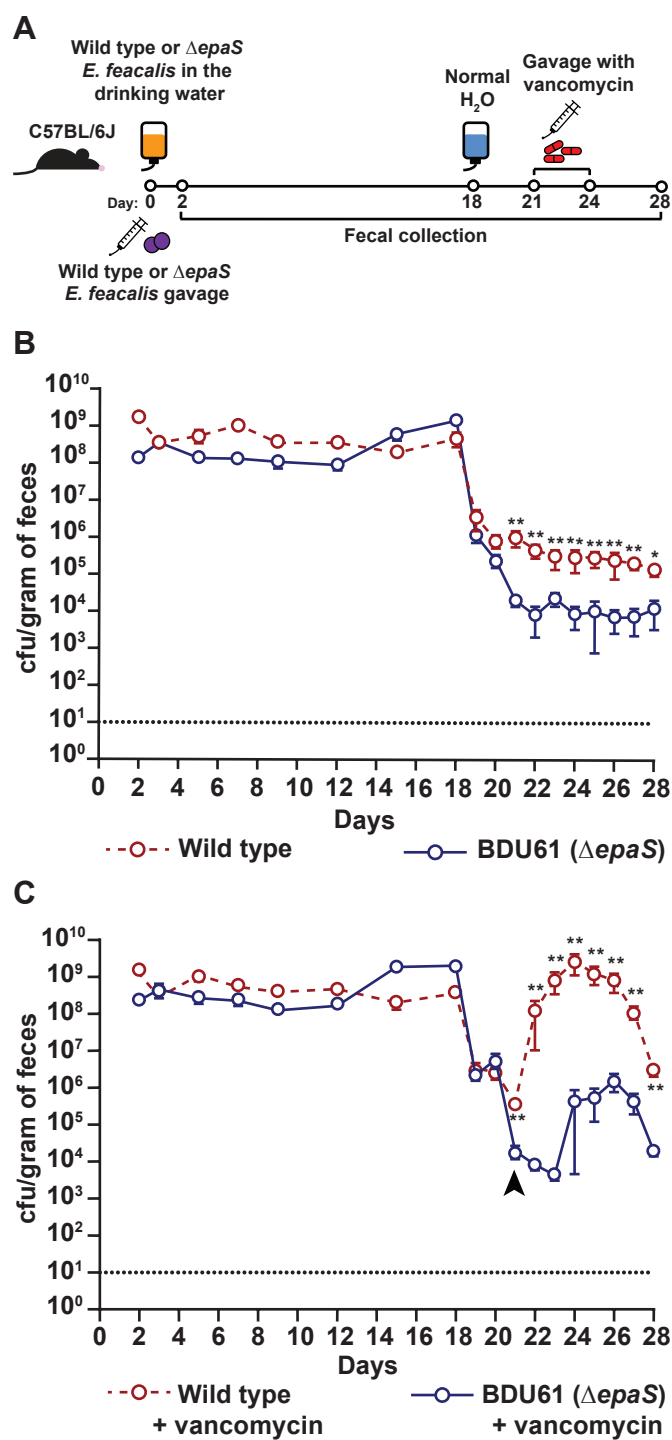

Figure 7

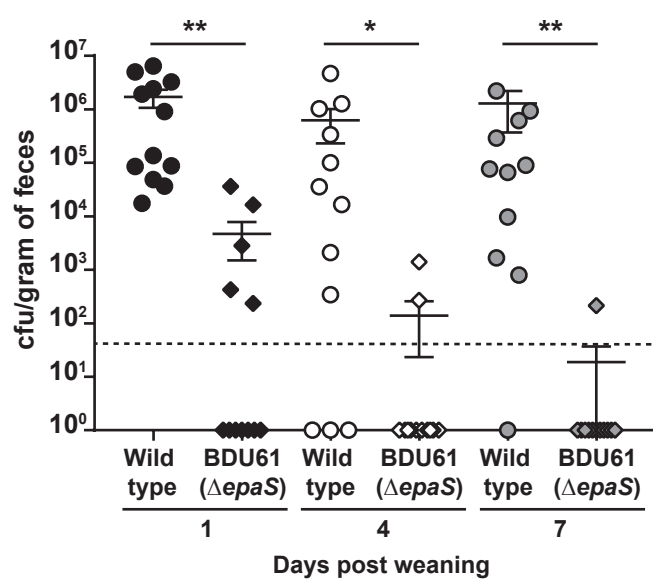

Figure 8
